# Supplementary material for: A2A Adenosine Receptor Antagonists: Are Triazolotriazine and Purine Scaffolds Interchangeable?
Source: MDPI journal article supplement (doi:10.3390/molecules27082386), 2022-04-07

## Supporting Information

# A<sub>2A</sub> Adenosine Receptor Antagonists: Are Triazolotriazine and Purine Scaffolds Interchangeable?

Andrea Spinaci <sup>1,†</sup>, Catia Lambertucci <sup>1,†</sup>, Michela Buccioni <sup>1</sup>, Diego Dal Ben <sup>1</sup>, Claudia Graiff <sup>2</sup>, Maria Cristina Barbalace <sup>3</sup>, Silvana Hrelia <sup>3</sup>, Cristina Angeloni <sup>3</sup>, Seyed Khosrow Tayebati <sup>4</sup>, Massimo Ubaldi <sup>4</sup>, Alessio Masi <sup>5</sup>, Karl-Norbert Klotz <sup>6</sup>, Rosaria Volpini <sup>1,\*</sup> and Gabriella Marucci <sup>1</sup>

- <sup>1</sup> Medicinal Chemistry Unit, School of Pharmacy, University of Camerino, Via Madonna delle Carceri, 62032 Camerino, Italy; andrea.spinaci@unicam.it (A.S.); catia.lambertucci@unicam.it (C.L.); michela.buccioni@unicam.it (M.B.); diego.dalben@unicam.it (D.D.B.); gabriella.marucci@unicam.it (G.M.)
- <sup>2</sup> Department of Chemistry, Life Sciences and Environmental Sustainability, University of Parma, Parco Area delle Scienze, 17/A, 43124 Parma, Italy; claudia.graiff@unipr.it
- <sup>3</sup> Department for Life Quality Studies, Alma Mater Studiorum, University of Bologna, Corso d'Augusto 237, 47921 Rimini, Italy; maria.barbalace2@unibo.it (M.C.B.); silvana.hrelia@unibo.it (S.H.); cristina.angeloni@unibo.it (C.A.)
- <sup>4</sup> Pharmacology Unit, School of Pharmacy, University of Camerino, Via Madonna delle Carceri, 62032 Camerino, Italy; khosrow.tayebati@unicam.it (S.K.T.); massimo.ubaldi@unicam.it (M.U.)
- <sup>5</sup> Department of Neuroscience, Psychology, Drug Research and Child's Health, NEUROFARBA, Università di Firenze, 50139 Firenze, Italy; alessio.masi@unifi.it
- <sup>6</sup> Institut für Pharmakologie und Toxikologie, University of Würzburg, Versbacher Straße 9, D-97078 Würzburg, Germany; klotz@toxi.uni-wuerzburg.de
- \* Correspondence: rosaria.volpini@unicam.it; Tel.: +39-07-3740-2278
- † These authors contributed equally to this work.

### Table of Contents

|                                                                                     |    |
|-------------------------------------------------------------------------------------|----|
| Materials and methods NMR spectroscopy-----                                         | S1 |
| <sup>1</sup> H NMR and <sup>13</sup> C NMR spectra of compounds 7–13 and 18–21----- | S2 |

### Materials and methods NMR spectroscopy

<sup>1</sup>H NMR and <sup>13</sup>C NMR spectra were obtained with a Bruker Ascend 500 MHz spectrometer;  $\delta$  values are in ppm,  $J$  values are in Hz. All exchangeable protons were confirmed by the addition of D<sub>2</sub>O.

**$^1\text{H}$ -NMR/ $^{13}\text{C}$ -NMR spectra of compounds 7–13, 18–21:**

7

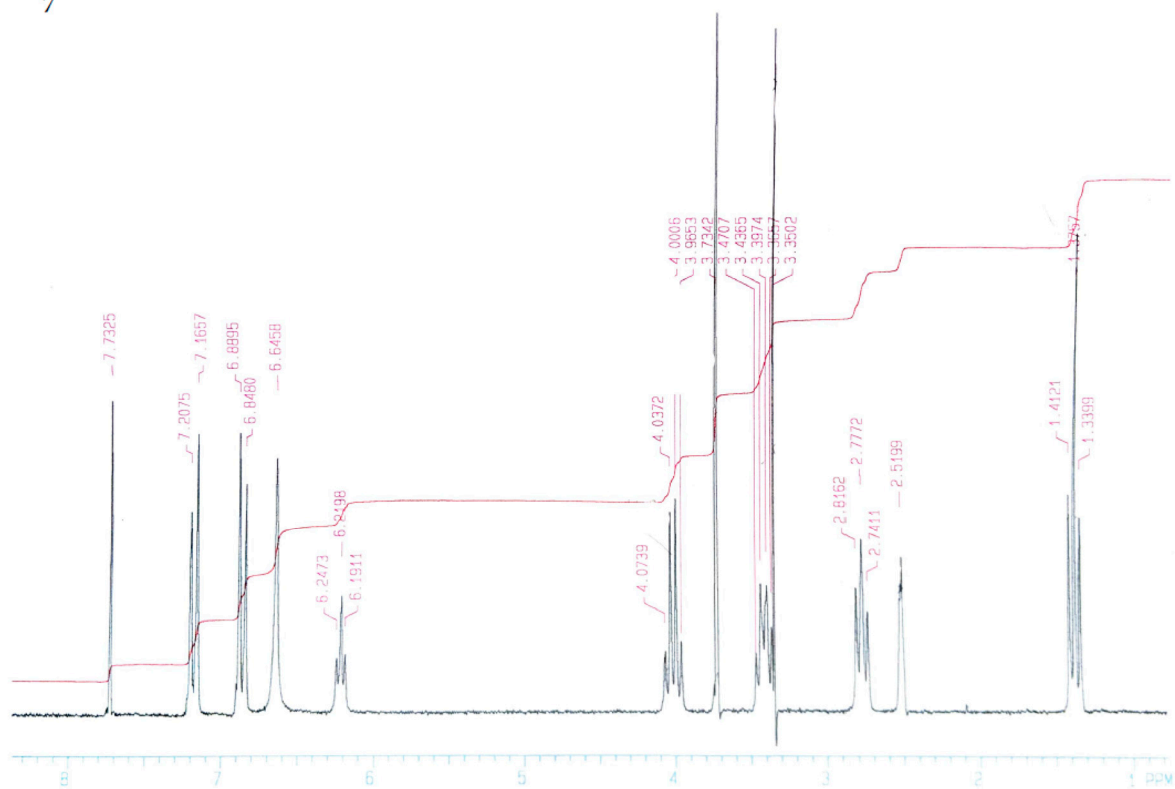

7

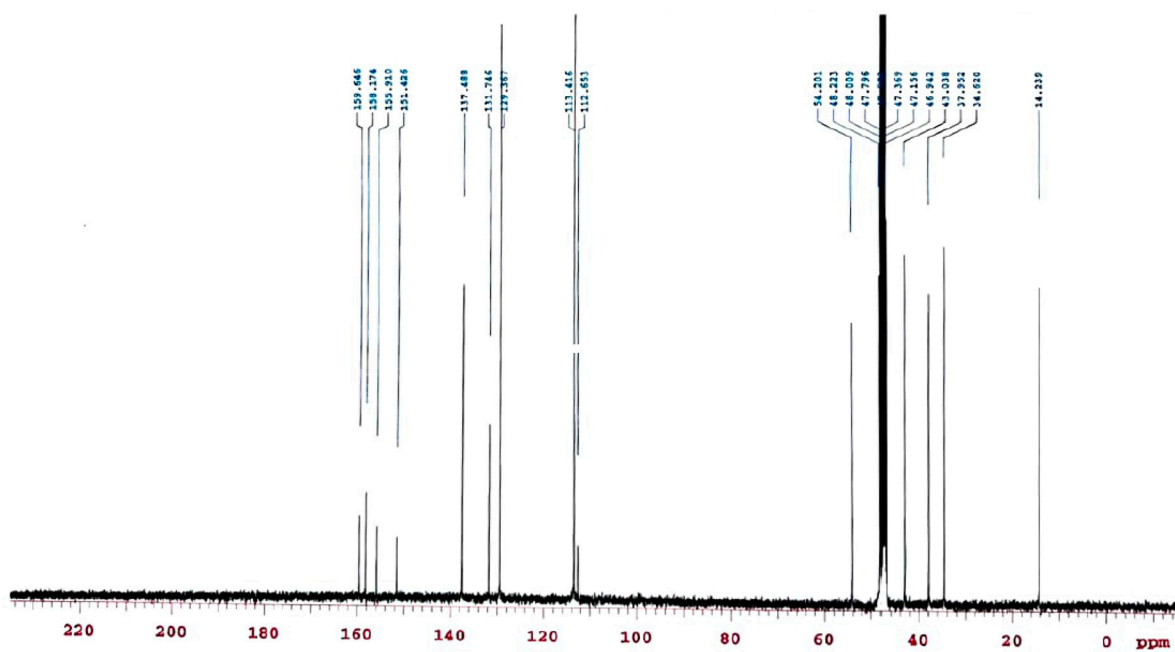

8

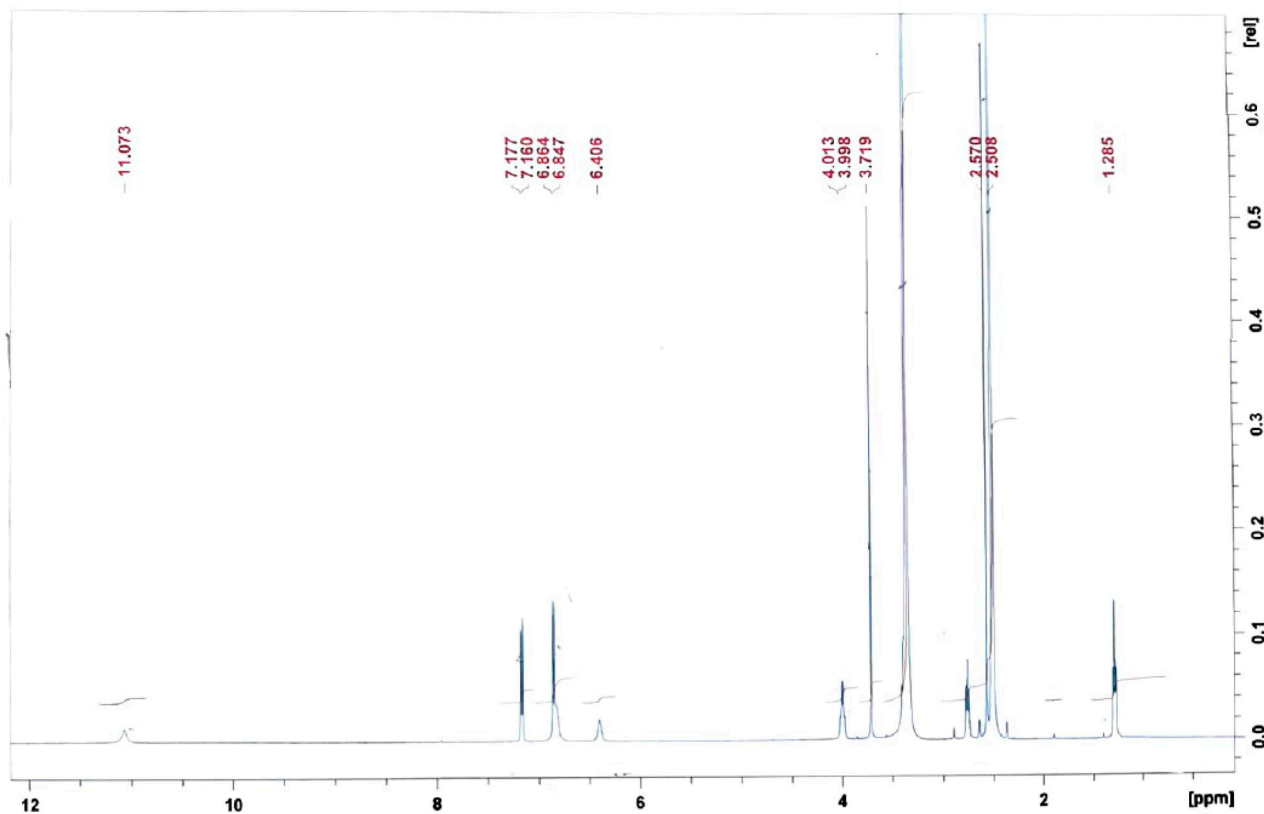

8

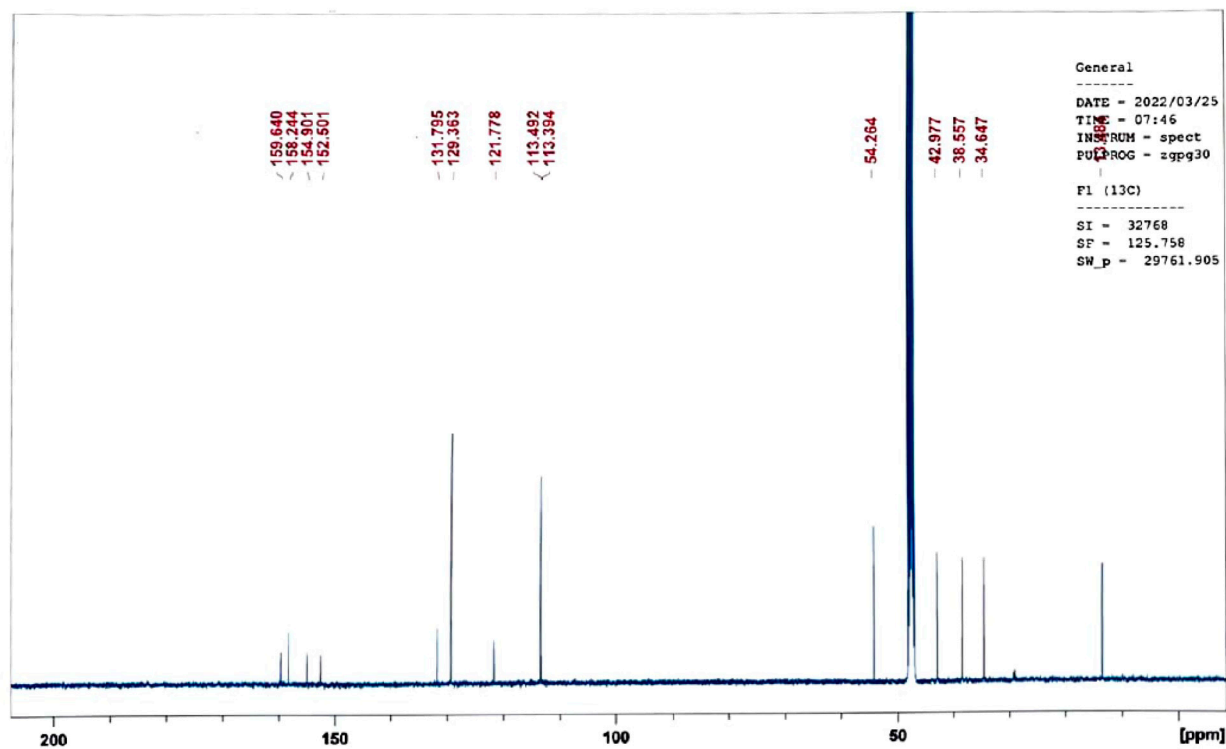

9

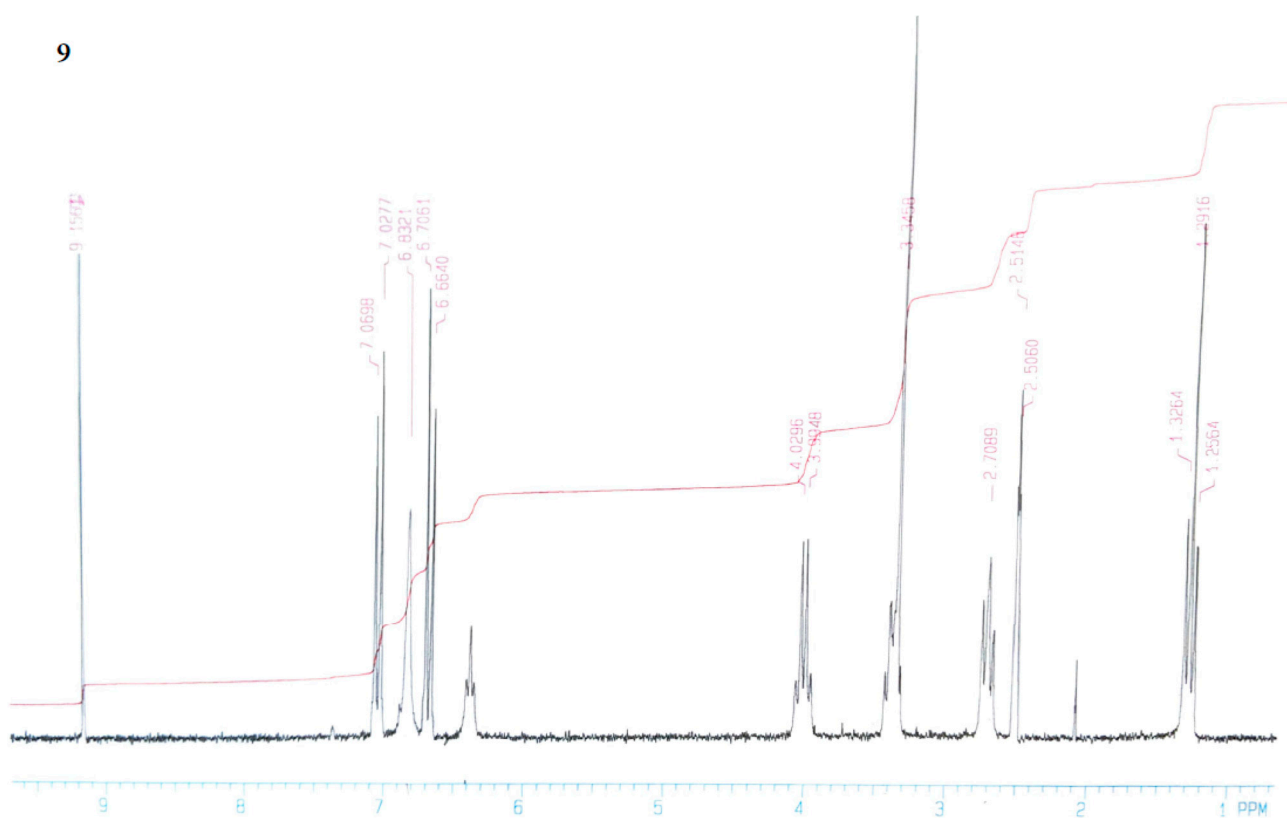

9

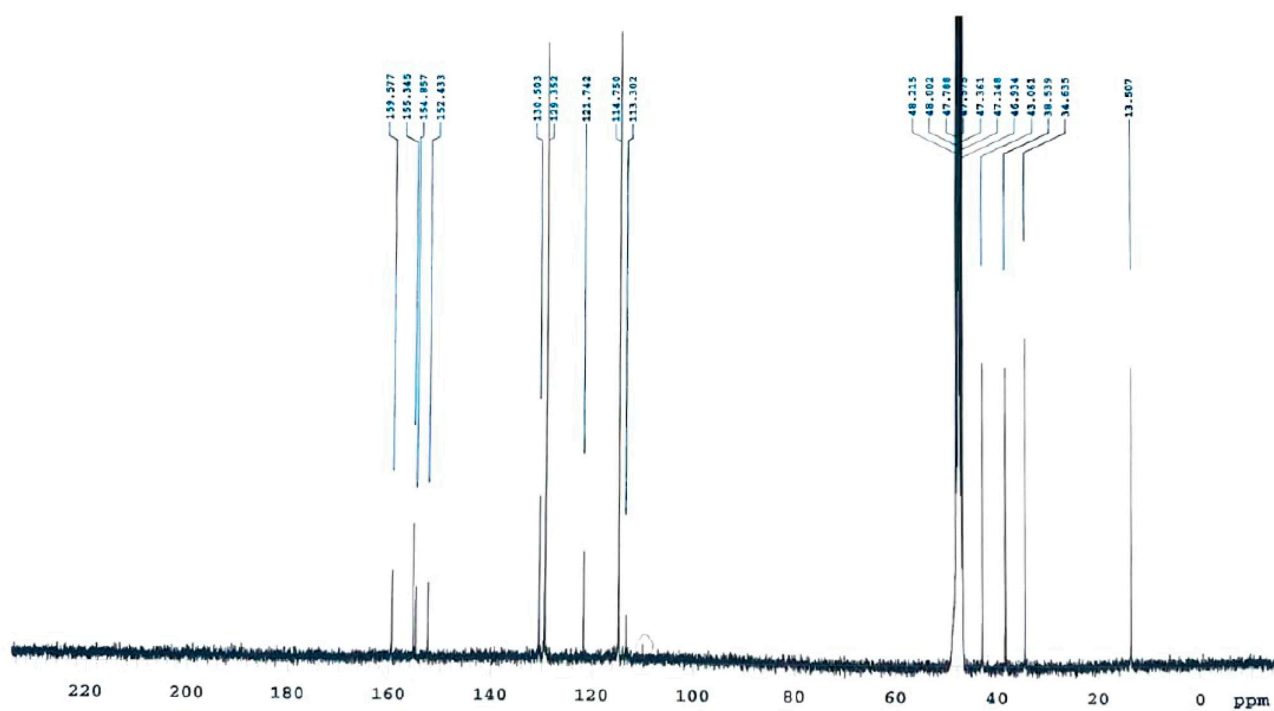

10

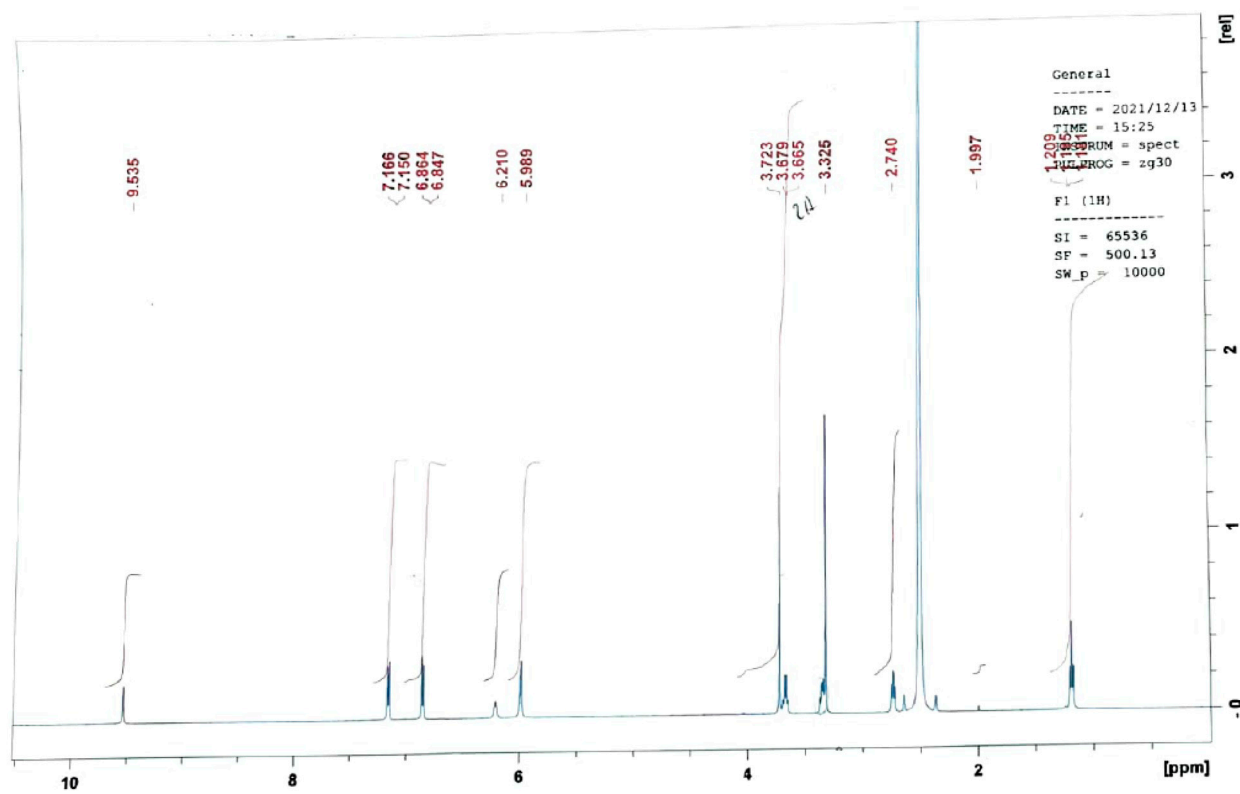

10

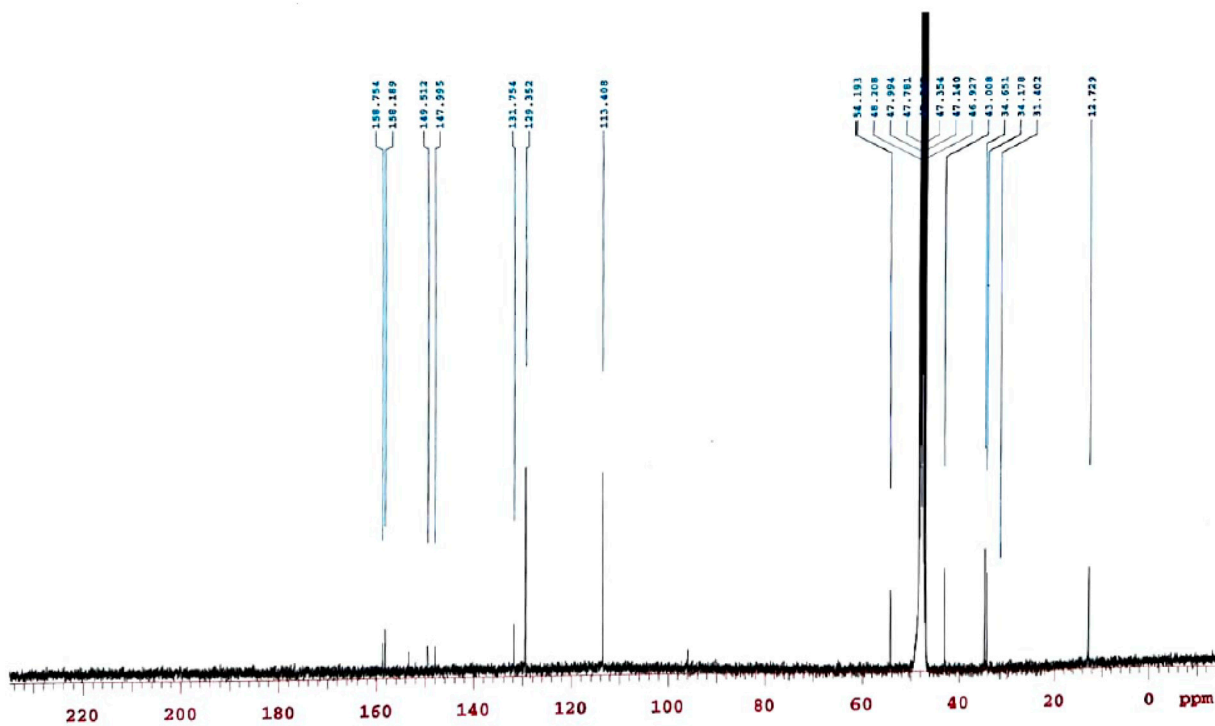

11

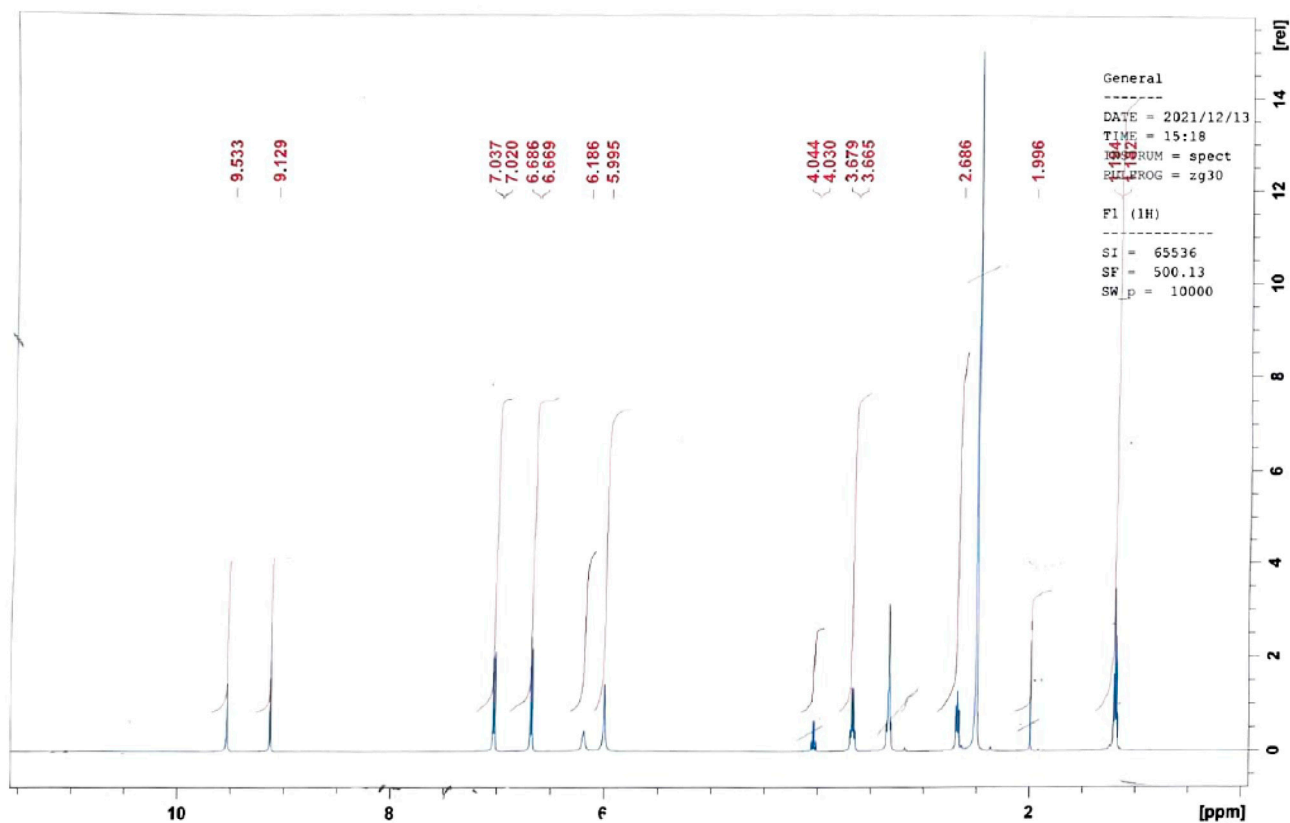

11

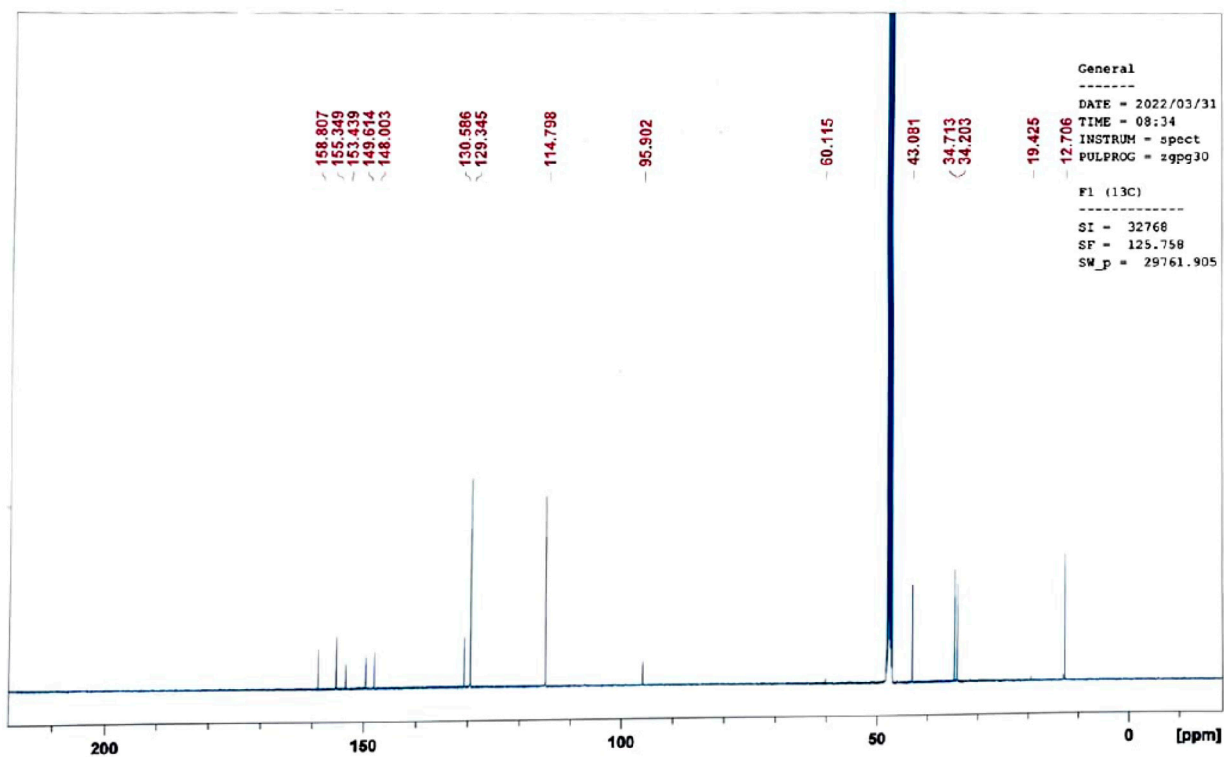

12

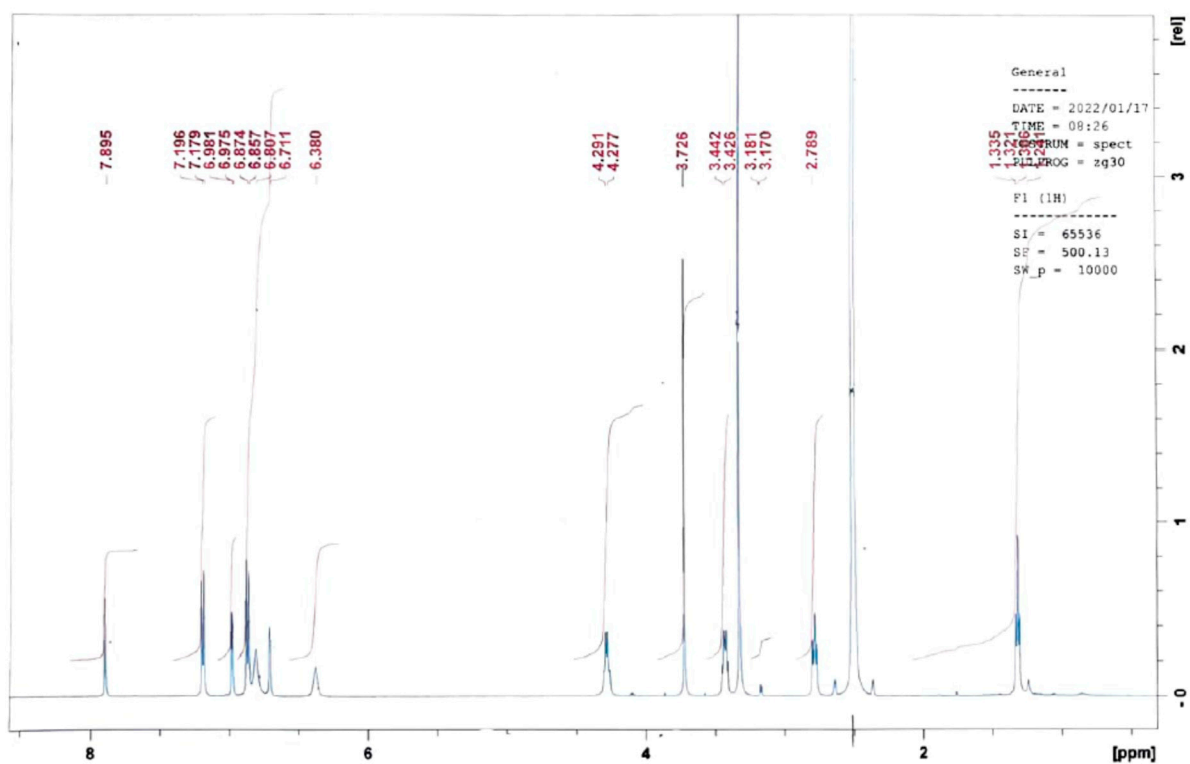

12

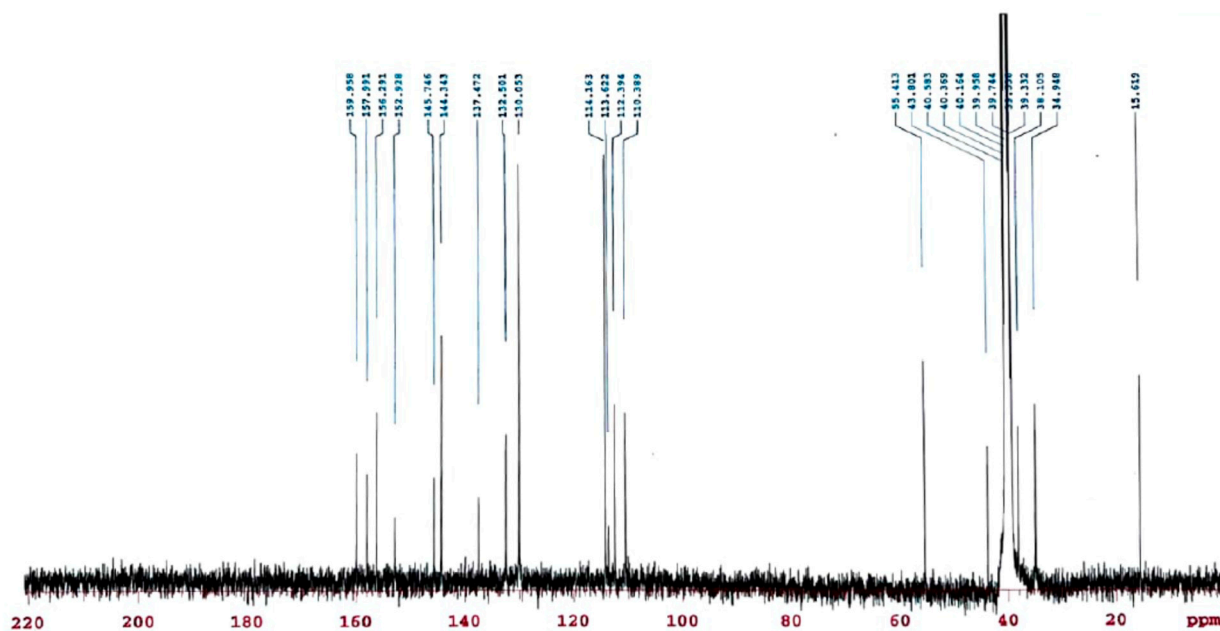

13

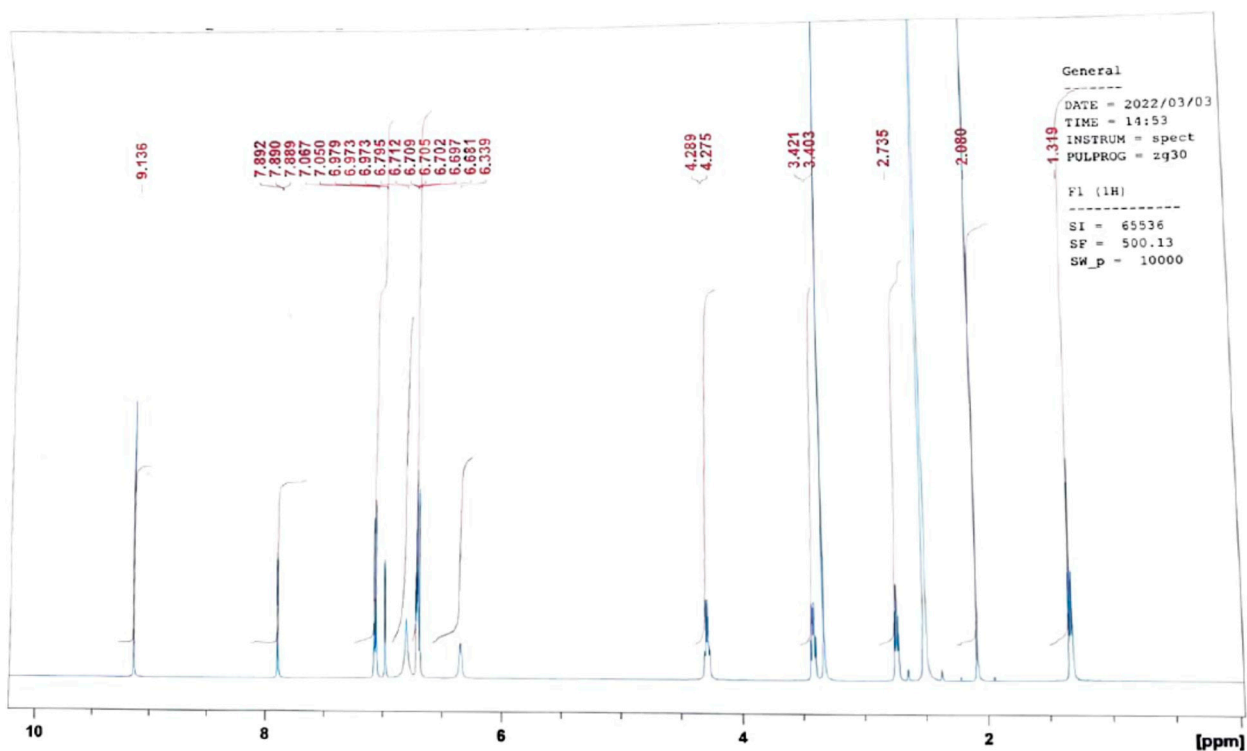

13

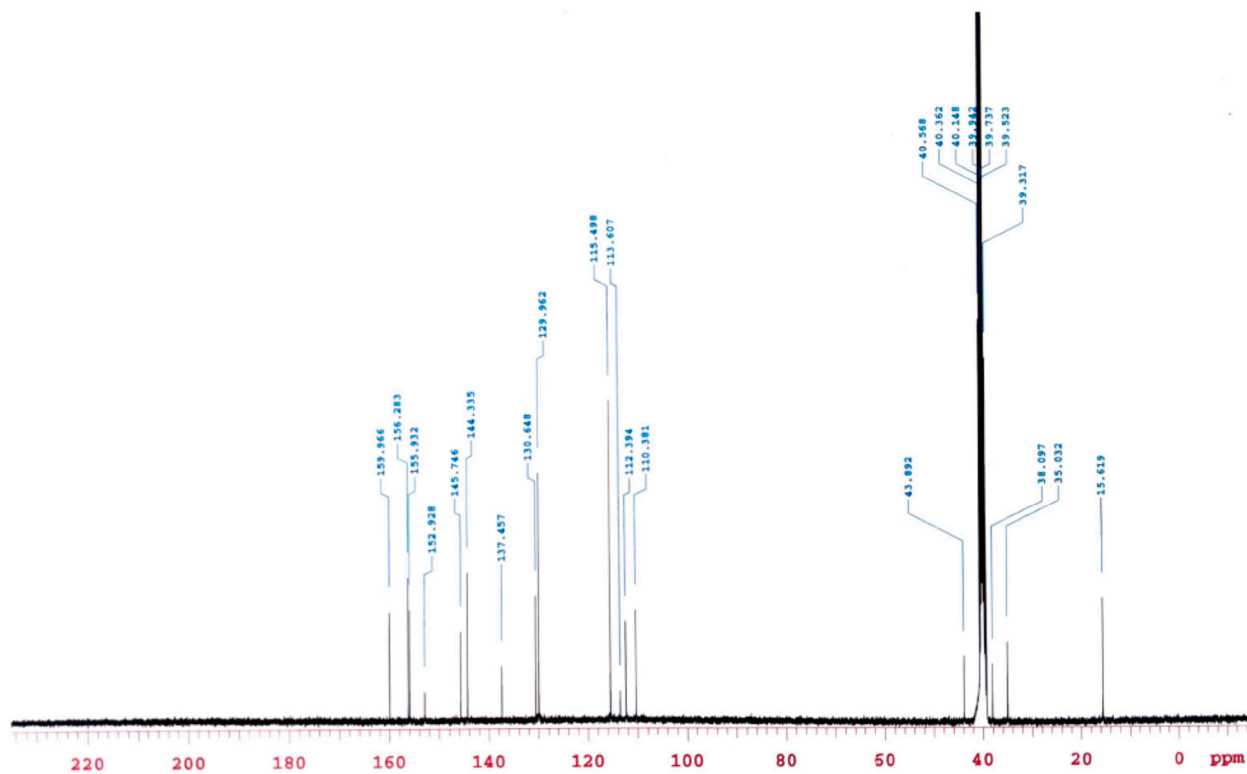

17

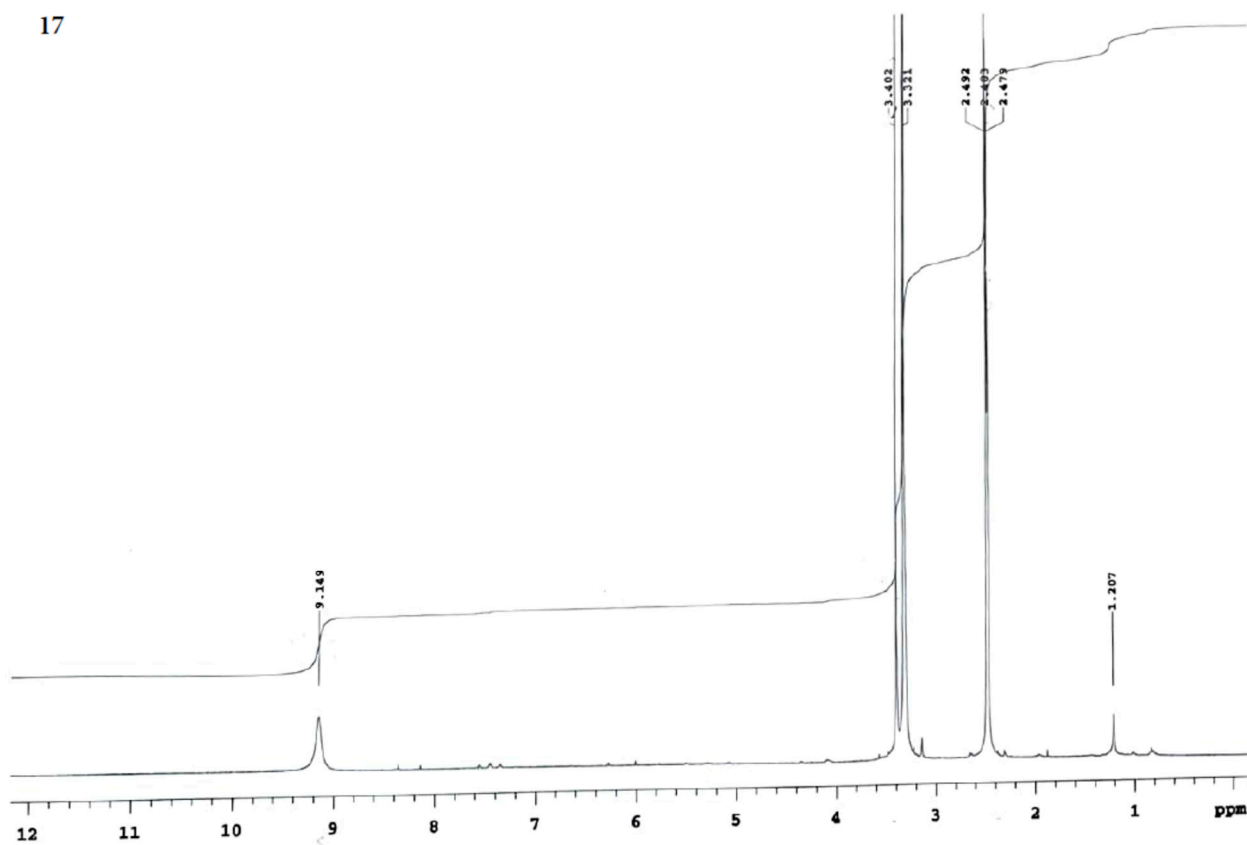

17

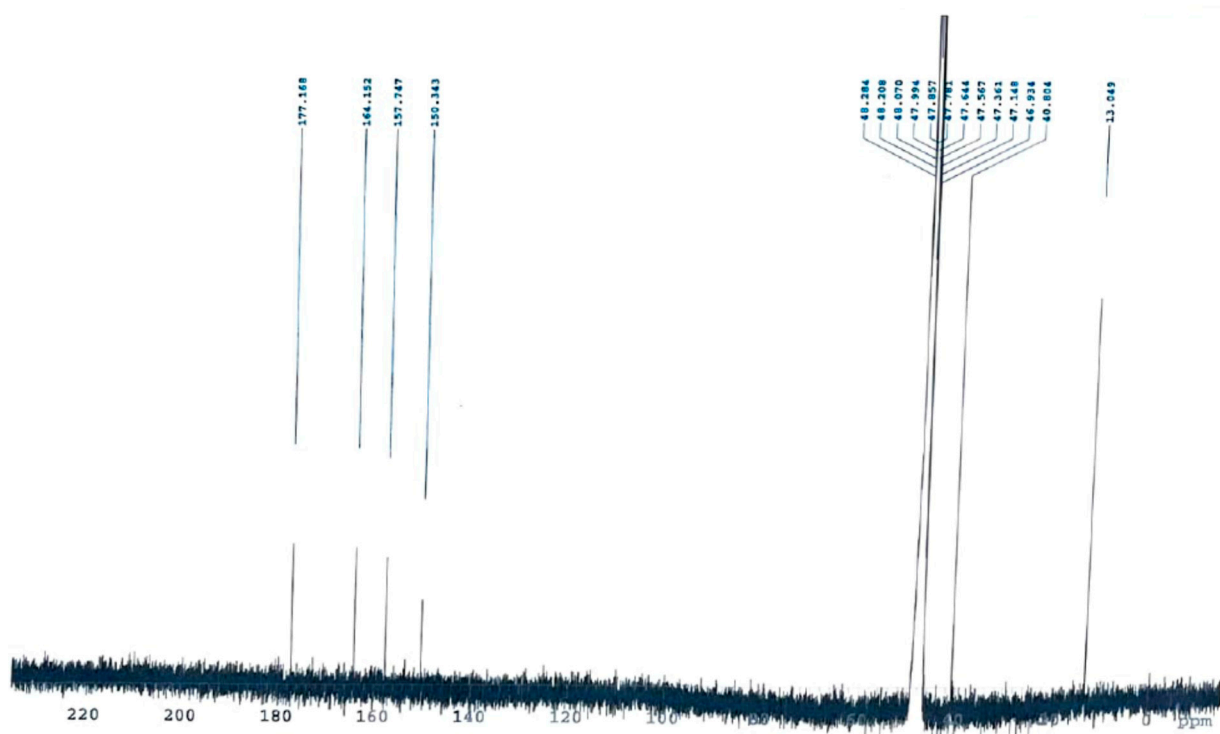

18

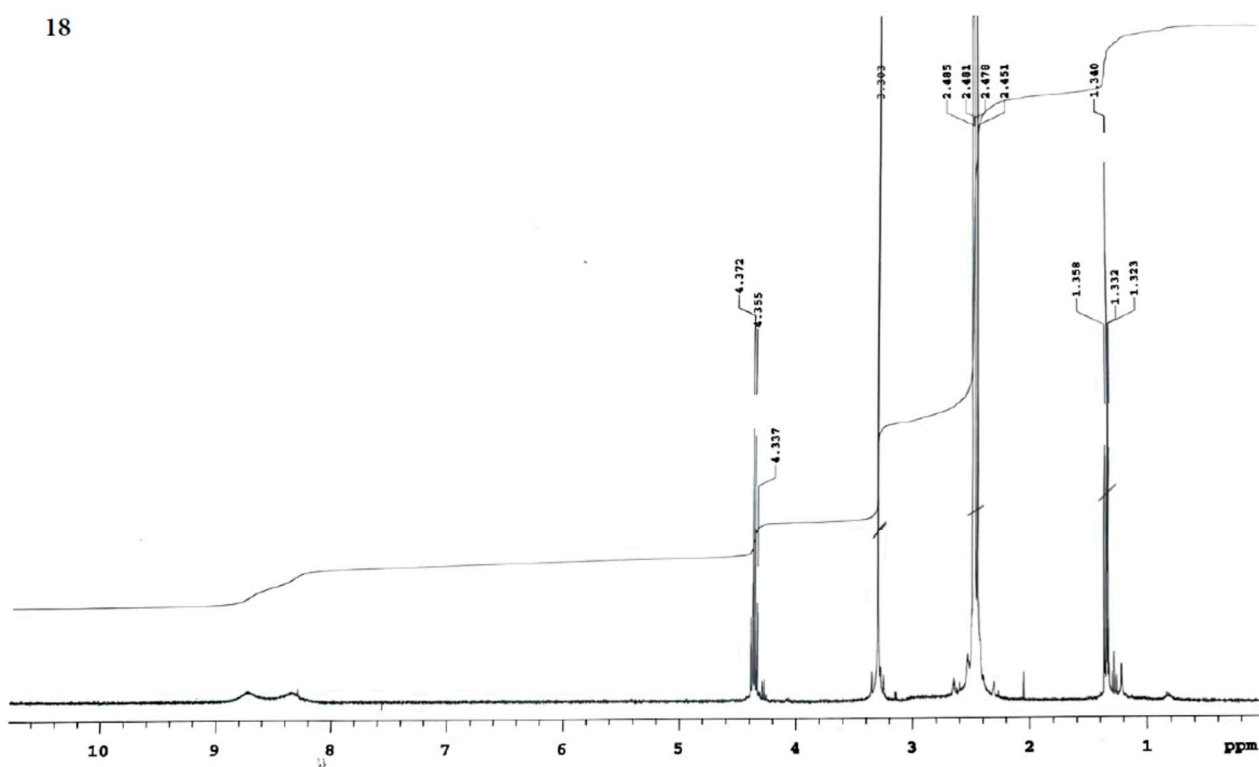

18

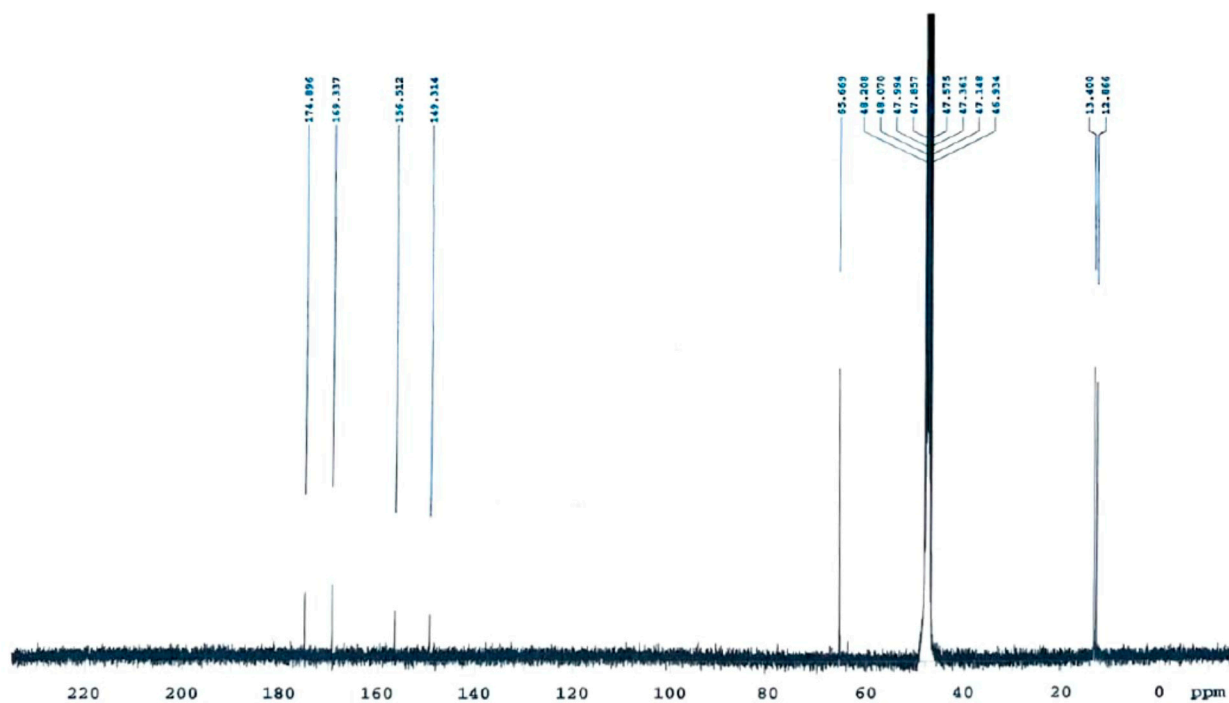

19

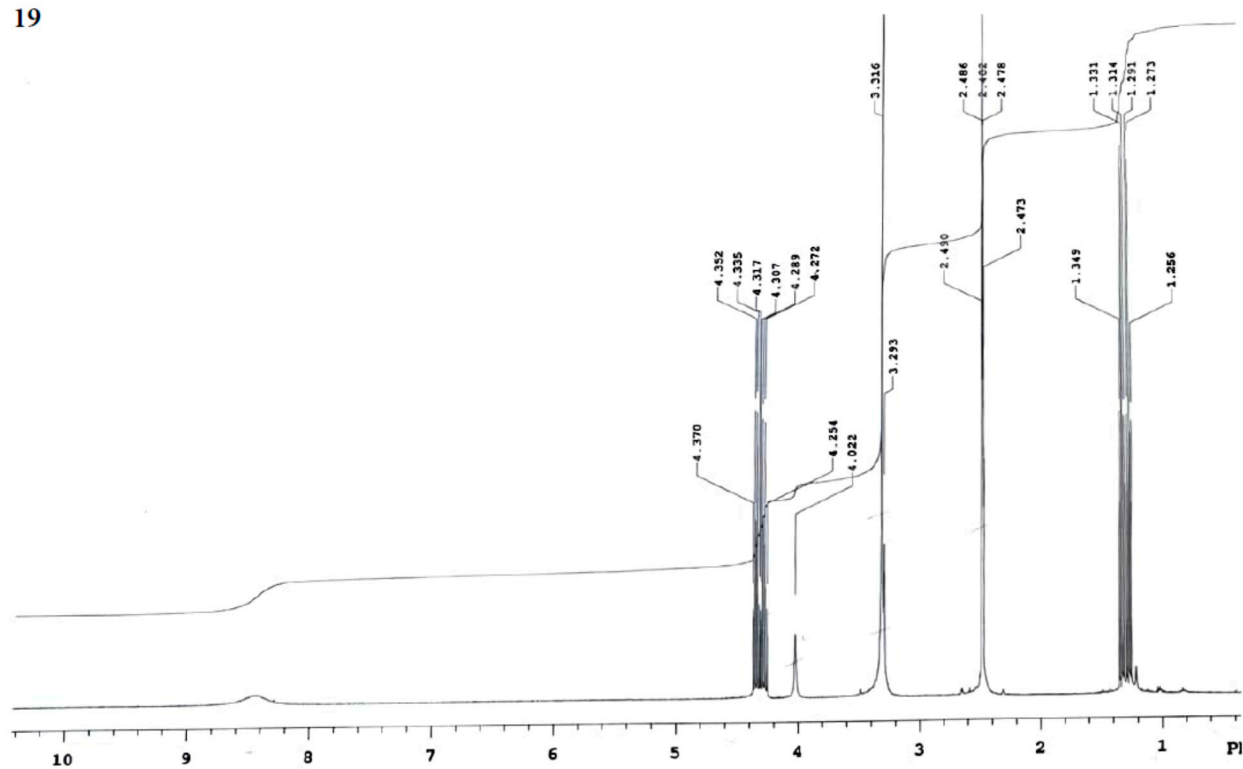

20

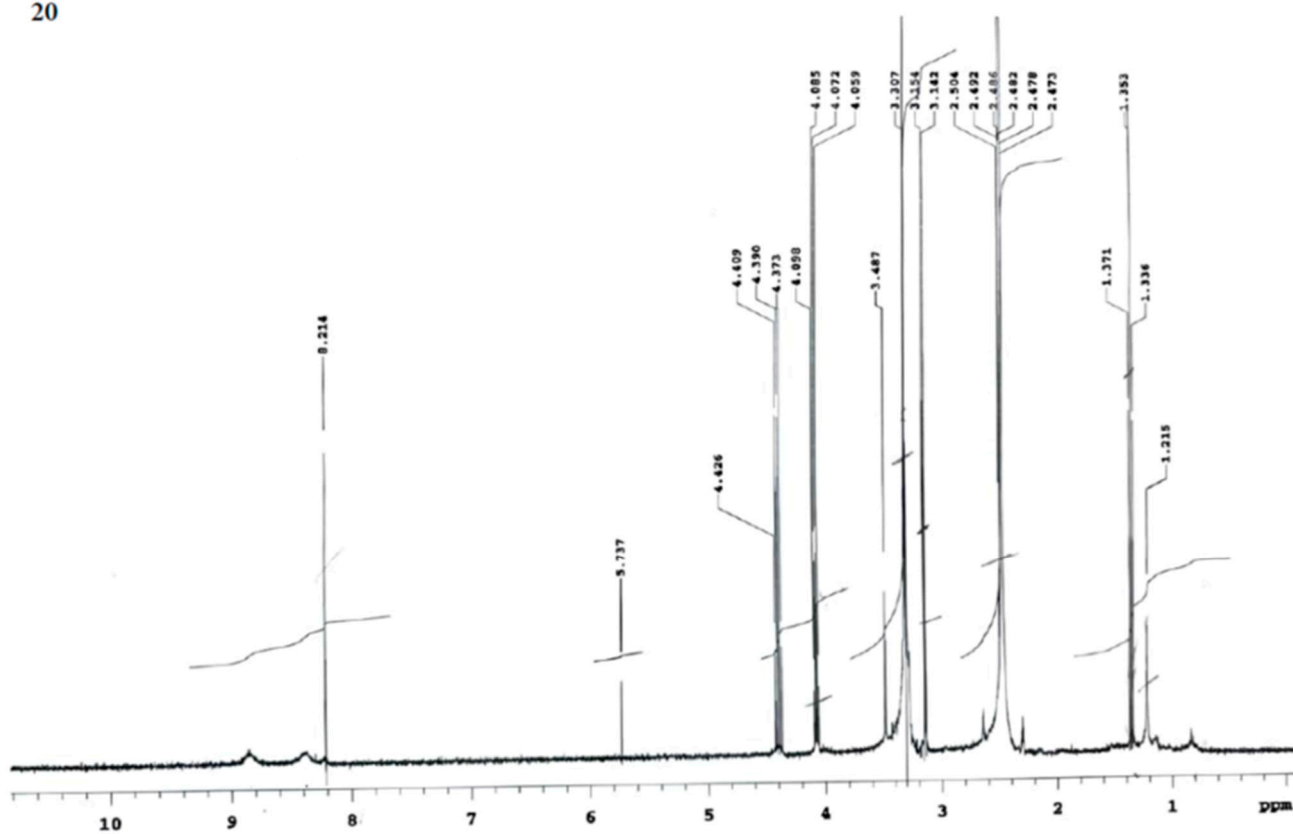

20

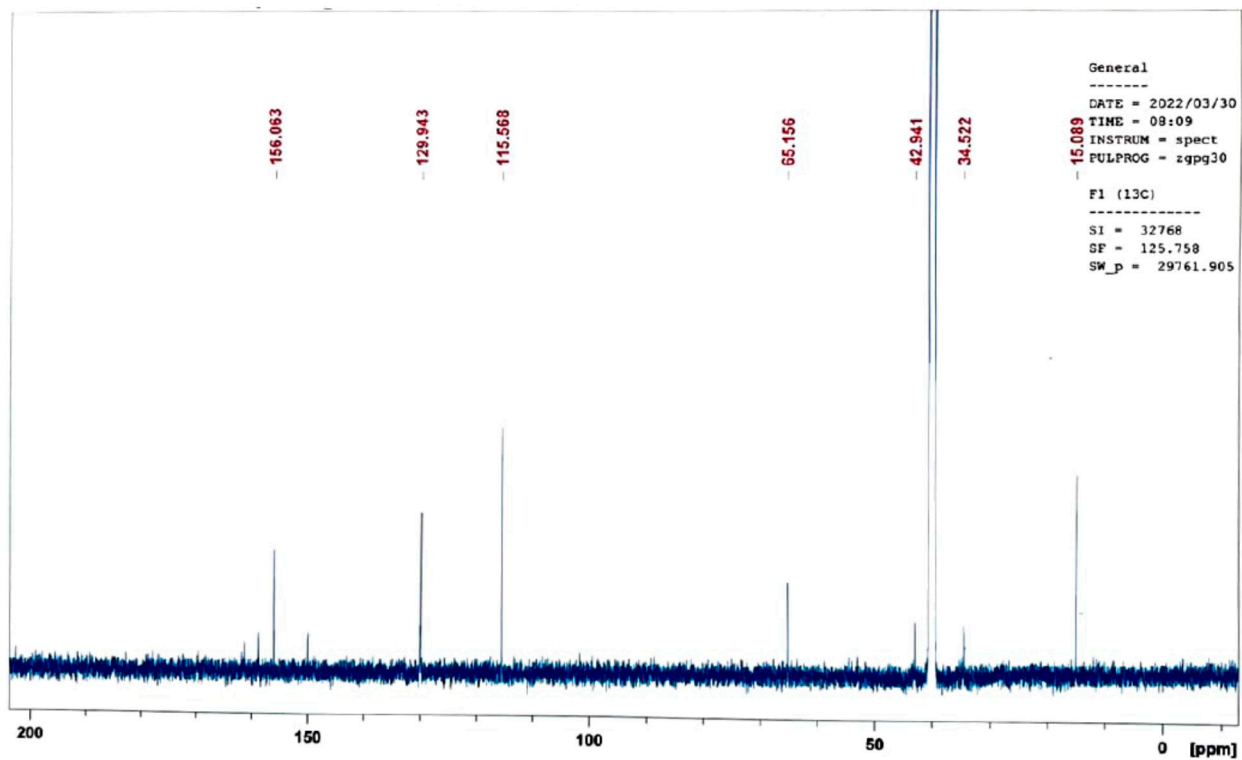

21

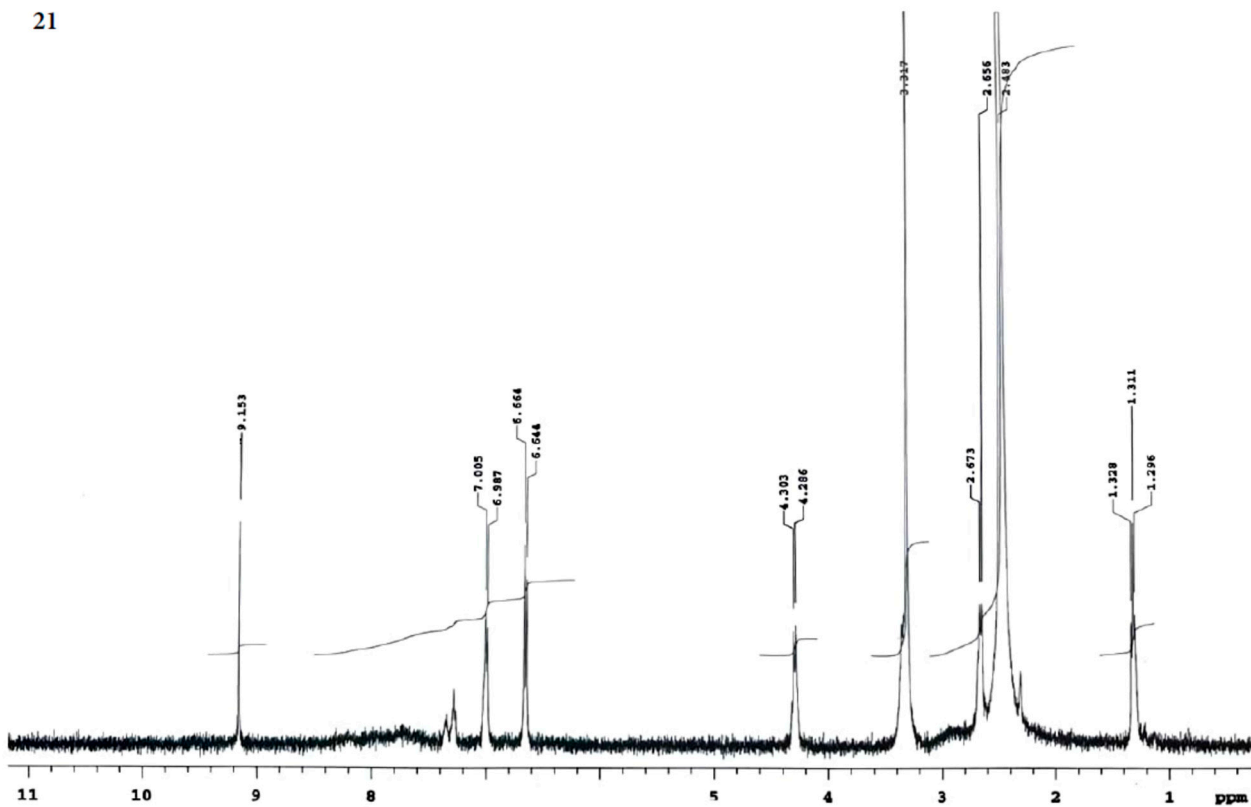

21

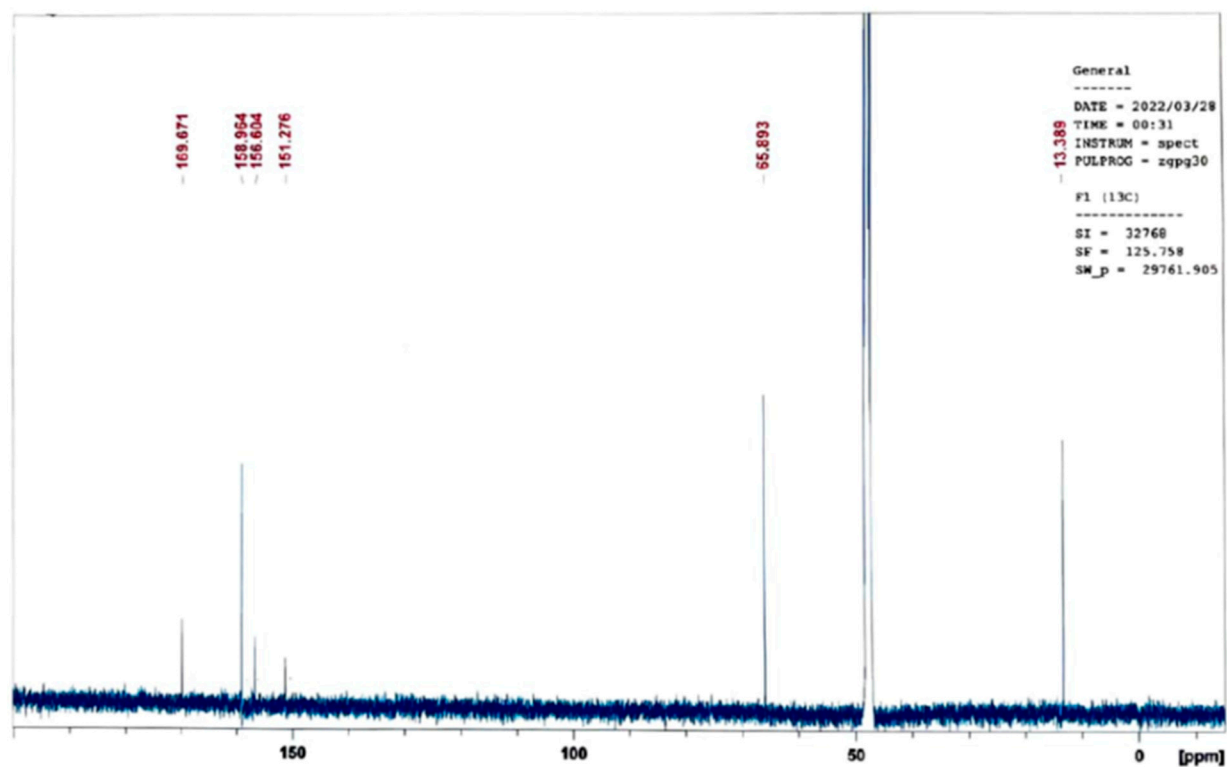

Supplement: s1 [file s1]
